# Supplementary material
Source: PubMed Central journal article supplement (PMC6439570)
Supplement: jamadermatol-155-79-s001.pdf [file jamadermatol-155-79-s001.pdf]

## Supplementary Online Content

Sanchez IM, Lowenstein S, Johnson KA, et al. Clinical features of neutrophilic dermatosis variants resembling necrotizing fasciitis. *JAMA Dermatology*. Published online October 31, 2018. doi:10.1001/jamadermatol.2018.3890

**eTable 1.** New Cases of Necrotizing Neutrophilic Dermatitis Misdiagnosed As Necrotizing Fasciitis in San Francisco, CA; Portland, OR; Minneapolis, MN

**eFigure 1.** Necrotizing Sweet Syndrome Morphology Mimicking PG

**eFigure 2.** Necrotizing Sweet Syndrome Histopathology

**eFigure 3.** Necrotizing Sweet Syndrome Histopathology

### eReferences

This supplementary material has been provided by the authors to give readers additional information about their work.

**eTable 1.** New Cases of Necrotizing Neutrophilic Dermatitis Misdiagnosed As Necrotizing Fasciitis in San Francisco, CA; Portland, OR; Minneapolis, MN

| Case, Year   | Age, Gender | Initial insult   | Co-morbidities                                | Site     | Class | Clinical features                                                                                                                                                                     | Histology                                                                                                                                                                                                                       | Imaging                                                                               | Key Lab Findings                                                                                                                                                                         | Treatment                                                                                        |
|--------------|-------------|------------------|-----------------------------------------------|----------|-------|---------------------------------------------------------------------------------------------------------------------------------------------------------------------------------------|---------------------------------------------------------------------------------------------------------------------------------------------------------------------------------------------------------------------------------|---------------------------------------------------------------------------------------|------------------------------------------------------------------------------------------------------------------------------------------------------------------------------------------|--------------------------------------------------------------------------------------------------|
| Case 1, 2017 | 43, M       | None             | Drug abuse (methamphetamines)                 | Leg      | PG    | - Ulcerated, purpuric skin plaques<br>- Violaceous, undermined borders<br>- Satellite lesions: flank, back                                                                            | Ulcerative, dense neutrophilic dermatitis                                                                                                                                                                                       | None                                                                                  | - Culture: negative<br>- WBC: 42,000/ $\mu$ L<br>- CRP: 250mg/L<br>- fever, shock                                                                                                        | Antibiotics<br>Debridements<br><b>Amputation</b><br>Systemic corticosteroids                     |
| Case 2, 2017 | 69, M       | None             | MDS                                           | Leg      | NS    | - Erythematous, tender plaque<br>- Nodular violaceous center<br>- Surrounding pitting edema<br>- Post-debridement: ulcer with violaceous border and bleeding base extending to muscle | - Subcutaneous necrosis<br>- Inflamed and necrotic skeletal muscle<br>- Muscle fascicles with multinucleated myocytes, neutrophils<br>- Fascia with fibrin deposition and extravasated erythrocytes with widening fibrous septa | U/S:<br>- soft tissue swelling<br>- without abscess or fluid collection               | - Culture: negative<br>- WBC: 5,900/ $\mu$ L<br>- Temperature: 39°C<br>- tachycardia, shock                                                                                              | Antibiotics<br>Debridement<br>Systemic corticosteroids<br>IVIG                                   |
| Case 3, 2017 | 69, M       | None             | MDS                                           | Face     | NS    | - Erythematous, violaceous, edematous plaque<br>- Admixed areas of necrosis and eschar formation<br>- Overlying yellow-brown thick crust                                              | - Dense, neutrophilic dermal infiltrate<br>- Marked papillary dermal edema<br>- Slight overlying dermal vesiculation                                                                                                            | CT:<br>- soft tissue swelling<br>- extension into soft tissue & scalp<br>- adenopathy | - Culture: <i>S. hominis</i> , coagulase negative <i>Staphylococcus</i> , <i>Candida albicans</i><br>- WBC: 35,000/ $\mu$ L<br>- Temperature: 40°C<br>- fever, tachycardia, shock, shock | Antibiotics<br>Debridement<br>Systemic corticosteroids                                           |
| Case 4, 2016 | 65, F       | None             | Essential thrombocytosis, hypothyroidism, CKD | Breast   | PG    | - Non-pustular, non-tender nodule<br>- Satellite lesions: elbow, buttocks                                                                                                             | Dense infiltration of polymorphonuclear neutrophils involving the dermis, subcutaneous fatty tissue and skeletal muscle                                                                                                         | None                                                                                  | - Culture: negative<br>- WBC: 49,000/ $\mu$ L<br>- CRP: 14mg/L<br>- Temperature: 38°C                                                                                                    | Antibiotics<br>Debridements<br>Topical steroids<br>Systemic corticosteroids<br>Mycophenolic acid |
| Case 5, 2016 | 32, M       | None             | History of DVT                                | Buttocks | PG    | - Pustule<br>- Painful, erythematous nodule                                                                                                                                           | Ulcerative, dense neutrophilic dermatitis                                                                                                                                                                                       | CT: normal                                                                            | - Culture: negative<br>- WBC: 37,000/ $\mu$ L<br>- Temperature: 40°C<br>- shock                                                                                                          | Antibiotics<br>Debridements                                                                      |
| Case 6, 2015 | 67, M       | Abrasion s/p MVA | Clotting disorder, DM2, kidney                | Foot     | PG    | - Ulcer w violaceous border<br>- Bullae with sloughing                                                                                                                                | - Ulcerative, dense inflammation of the skin and subcutaneous tissue                                                                                                                                                            | None                                                                                  | - Culture: negative<br>- WBC: 33,000/ $\mu$ L<br>- Temperature: 39°C                                                                                                                     | Antibiotics<br>Debridements<br><b>Amputation</b>                                                 |

|  |  |  |                 |  |  |                                                                            |                                                                                                          |  |  |                                                                                  |
|--|--|--|-----------------|--|--|----------------------------------------------------------------------------|----------------------------------------------------------------------------------------------------------|--|--|----------------------------------------------------------------------------------|
|  |  |  | failure,<br>HTN |  |  | - Satellite lesions: leg<br>(purple discoloration 2<br>weeks after insult) | - Subcutaneous<br>abscess formation<br>and fat necrosis<br>- Margins viable<br>though mildly<br>inflamed |  |  | Systemic<br>corticosteroids<br>MMF<br>Steroid injection<br>Topical<br>gentamicin |
|--|--|--|-----------------|--|--|----------------------------------------------------------------------------|----------------------------------------------------------------------------------------------------------|--|--|----------------------------------------------------------------------------------|

CKD, chronic kidney disease; CRP, c-reactive protein; CT, computerized tomography; DM2, DVT, deep vein thrombosis; DM2, diabetes mellitus type 2; ESR, erythrocyte sedimentation rate; F, female; HTN, hypertension; IVIG, intravenous immunoglobulin; M, male; MDS, myelodysplastic syndrome; MMF, mycophenolate mofetil; MVA, motor vehicle accident; NF, necrotizing fasciitis; NSS, necrotizing Sweet syndrome; PG, pyoderma gangrenosum; S., *Staphylococcus*; s/p, status post; U/S, ultrasound; WBC, white blood cell count

**eFigure 1. Necrotizing Sweet Syndrome Morphology Mimicking PG**

Violaceous margins, surrounding warmth, and necrotic skin and/or tissue in NSS typically follow pathergic insults, such as debidement.

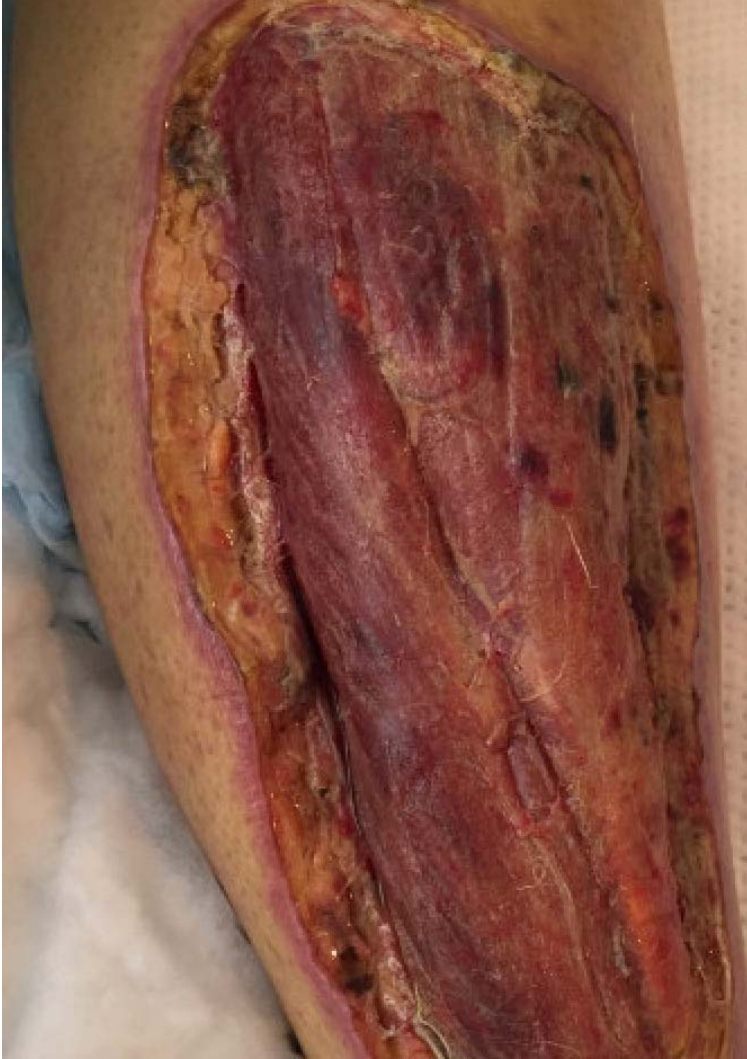

**eFigure 2. Necrotizing Sweet Syndrome Histopathology**

A diffuse infiltrate of neutrophils and karyorrhectic debris arrayed throughout the papillary and superficial reticular dermis. (Hematoxylin and eosin (H&E) stain, original magnification x 400).

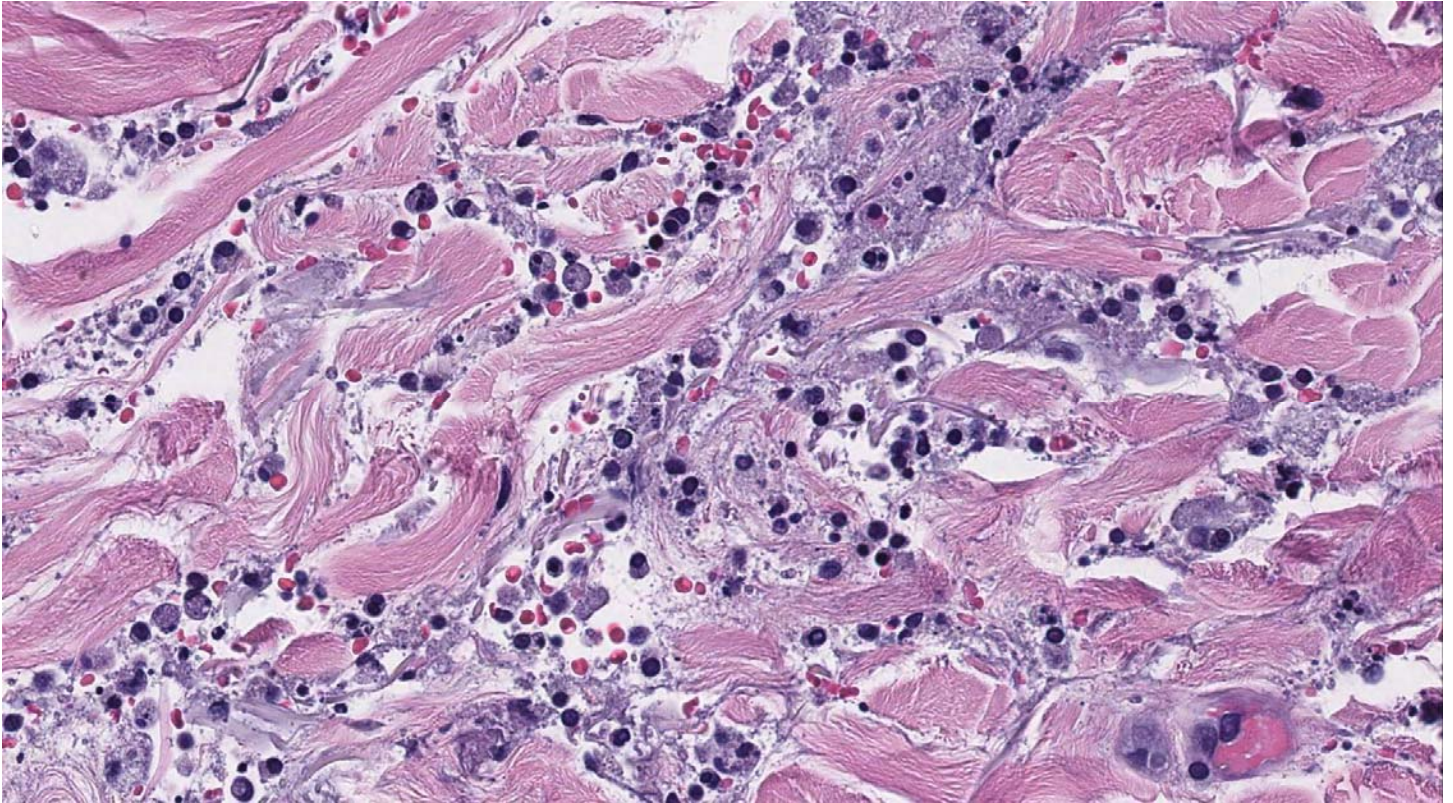

**eFigure 3. Necrotizing Sweet Syndrome Histopathology**

Surgical debridement of the leg tissue demonstrated an acute inflammatory infiltrate in the muscle and subcutaneous fat involving the fibrous septa and lipocyte lobules without involving the dermis or epidermis, diagnosed as septal and lobular panniculitis. (H&E stain, original magnification x 250).

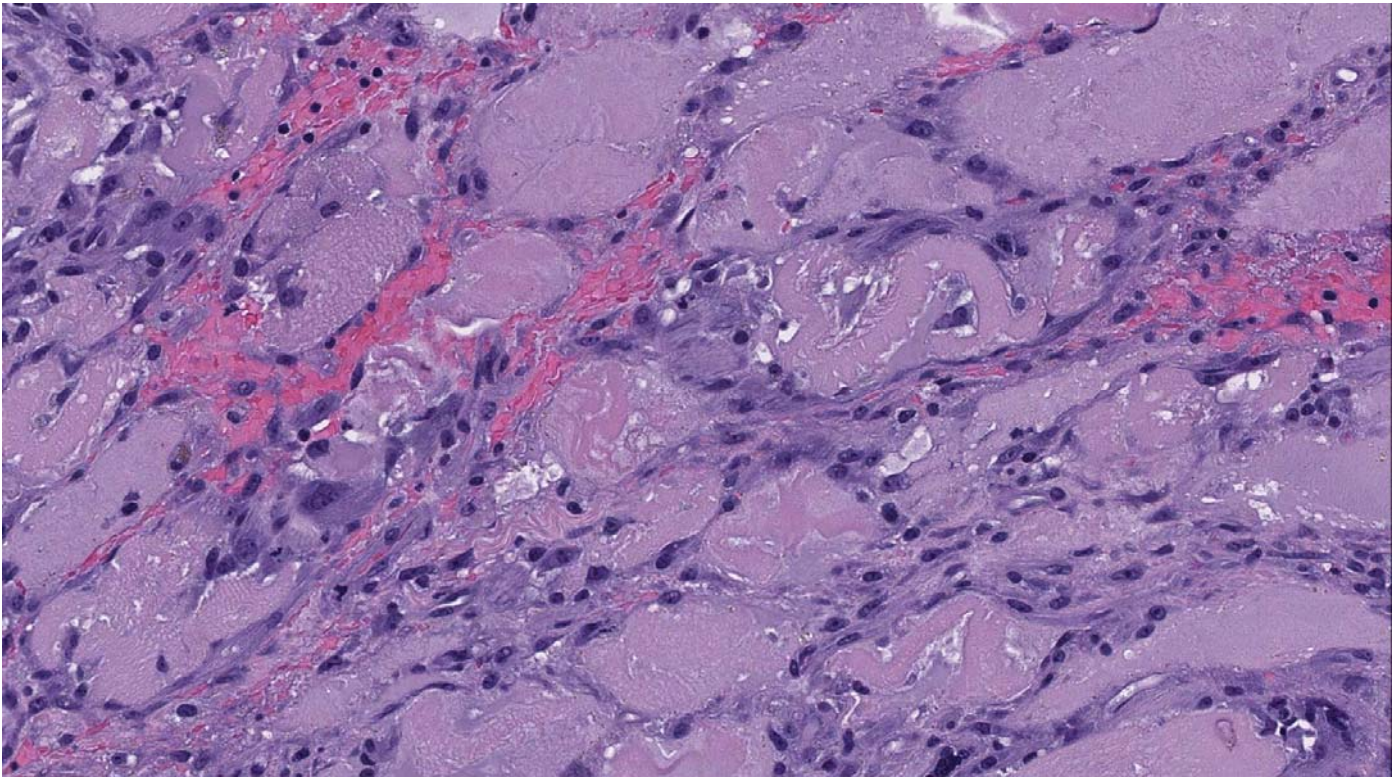

## eReferences

1. Ayestaray B, Dudrap E, Chartaux E, Verdier E, Joly P. Necrotizing pyoderma gangrenosum: an unusual differential diagnosis of necrotizing fasciitis. *Journal of plastic, reconstructive & aesthetic surgery : JPRAS*. 2010;63(8):e655-658.
2. Barr KL, Chhatwal HK, Wesson SK, Bhattacharyya I, Vincek V. Pyoderma gangrenosum masquerading as necrotizing fasciitis. *American journal of otolaryngology*. 2009;30(4):273-276.
3. Berger N, Ebenhoch M, Salzmann M. Postoperative Pyoderma Gangrenosum in Children: The Case Report of a 13-Year-Old Boy With Pyoderma Gangrenosum After Hip Reconstruction Surgery and a Review of the Literature. *Journal of pediatric orthopedics*. 2017;37(6):e379-e383.
4. Berry MG, Tavakkolizadeh A, Sommerlad BC. Necrotizing ulceration after breast reduction. *Journal of the Royal Society of Medicine*. 2003;96(4):186-187.
5. Berryman J, Hilton R, Handoyo K. Pyoderma gangrenosum mimicking necrotizing fasciitis: A case of anchoring bias. *Journal of General Internal Medicine*. 2017;32(2):S574.
6. Bisarya K, Azzopardi S, Lye G, Drew PJ. Necrotizing fasciitis versus pyoderma gangrenosum: securing the correct diagnosis! A case report and literature review. *Eplasty*. 2011;11:e24.
7. Chia MW, Teo L, Tay YK, Poh WT. Pustular pyoderma gangrenosum: an uncommon variant which is easily misdiagnosed. *Dermatology online journal*. 2008;14(2):21.
8. Choe H, Sakano H, Takigami H, Inaba Y, Matsuo K, Saito T. Pyoderma gangrenosum with wrist joint destruction: case report. *The Journal of hand surgery*. 2013;38(2):357-361.
9. Cordts T, Bigdeli AK, Harhaus L, et al. Pyoderma gangrenosum following complex reconstruction of a large-scale lower limb defect by combined Parascapular and latissimus dorsi flap. *Journal of surgical case reports*. 2017;2017(1).
10. De Menezes D, Yusuf E, Borens O. Pyoderma gangrenosum after minor trauma in a pregnant woman, mistaken for necrotizing fasciitis: report of a case and literature review. *Surgical infections*. 2014;15(4):441-444.
11. de Moya MA, Wong JT, Kroshinsky D, Robbins GK, Shenoy-Bhangle AS, Gimbel DC. Case records of the Massachusetts General Hospital. Case 28-2012. A 30-year-old woman with shock and abdominal-wall necrosis after cesarean section. *The New England journal of medicine*. 2012;367(11):1046-1057.
12. de Souza EF, da Silva GA, Dos Santos GR, et al. Pyoderma Gangrenosum Simulating Necrotizing Fasciitis. *Case reports in medicine*. 2015;2015:504970.
13. English M, Elghannam H, Zaman T. A case of pyoderma gangrenosum of the lung. *Chest*. 2009;136(4).
14. Gassman A, Sinno S, Milner R, Gamelli R. Pyoderma gangrenosum: A new complication after groin exposure for attempted endovascular aortic stent-graft placement. *Vascular*. 2012;20(3):170-173.
15. Havemann BD, Goodgame R. Grand rounds in gastroenterology from Baylor College of Medicine: A pustular skin rash in a woman with 2 weeks of diarrhea. *MedGenMed Medscape General Medicine*. 2005;7(4).
16. Hicks MI, Garton KJ, Bitterly TJ. Pyoderma gangrenosum in the setting of reconstructive breast surgery. *Journal of the American Academy of Dermatology*. 2010;62(3):AB36.
17. Hradil E, Jeppsson C, Hamnerius N, Svensson A. The diagnosis you wish you had never operated on: Pyoderma gangrenosum misdiagnosed as necrotizing fasciitis—a case report. *Acta orthopaedica*. 2017;88(2):231-233.
18. Imhof L, Meier B, Frei P, et al. Severe Sweet's Syndrome with Elevated Cutaneous Interleukin-1beta after Azathioprine Exposure: Case Report and Review of the Literature. *Dermatology (Basel, Switzerland)*. 2015;230(4):293-298.
19. Kim BY, Chun DI, Jeon YM, Kim HS. Necrotizing Sweet's syndrome presenting as necrotizing fasciitis with a good response to immune suppressant treatment. *Int J Rheum Dis*. 2017.
20. Kim YS, Kim HK, Han YS. Importance of Accurate Diagnosis in Pyoderma Gangrenosum. *Archives of craniofacial surgery*. 2014;15(3):138-141.
21. Kroshinsky D, Alloo A, Rothschild B, et al. Necrotizing Sweet syndrome: a new variant of neutrophilic dermatosis mimicking necrotizing fasciitis. *Journal of the American Academy of Dermatology*. 2012;67(5):945-954.
22. Lee JH, Choi HJ. Necrotizing fasciitis by steroid-induced Sweet's syndrome: a case report. *International wound journal*. 2016;13(5):1057-1059.
23. Lipof JS, Beck LA, Reddy SC, Southgate RD, Carney-Young K, Hammert WC. Necrotizing Sweet Syndrome of the Upper Extremity After Elective Hand Surgery. *The Journal of hand surgery*. 2017.
24. Lucchina S, Parvex SL, Biegger P, Fusetti C. FK-506 ointment: An effective adjuvant therapy to treat a dramatic case of pyoderma gangrenosum of unilateral hand. *Chinese Journal of Traumatology - English Edition*. 2009;12(3):181-183.
25. Mahajan AL, Ajmal N, Barry J, Barnes L, Lawlor D. Could your case of necrotising fasciitis be Pyoderma gangrenosum? *British journal of plastic surgery*. 2005;58(3):409-412.
26. Mansur AT, Balaban D, Goktay F, Takmaz S. Pyoderma gangrenosum on the breast: a case presentation and review of the published work. *The Journal of dermatology*. 2010;37(1):107-110.
27. Matsumura Y, Nishiwaki F, Morita N, Kore-Eda S, Miyachi Y. Pyoderma gangrenosum in a patient with myelodysplastic syndrome followed by possible extracutaneous manifestations in the gallbladder, liver, bone and lung. *Journal of Dermatology*. 2011;38(11):1102-1105.
28. Minamiyama R, Asai J, Kaneko Y, et al. Necrotizing Sweet syndrome in a patient with myelodysplastic syndrome. *Clinical and experimental dermatology*. 2017.

29. Myers CN, Velani S, Teba CV. Pyoderma gangrenosum complicating pacemaker insertion, masquerading as necrotizing fasciitis and distributive shock in a patient with myelodysplastic syndrome. *American Journal of Respiratory and Critical Care Medicine*. 2017;195.
30. Nakajima N, Ikeuchi M, Izumi M, Kuriyama M, Nakajima H, Tani T. Successful treatment of wound breakdown caused by pyoderma gangrenosum after total knee arthroplasty. *Knee*. 2011;18(6):453-455.
31. Nakamura M, Ghaznavi AM, Darian V, Siddiqui A. Pyoderma gangrenosum following the revision of a breast reconstruction and abdominoplasty. *Open Dermatology Journal*. 2014;8(1):68-71.
32. Nakanishi K, Kinjo M. Mimicker of necrotising fasciitis with systemic inflammatory response syndrome: recurrent necrotising Sweet's syndrome associated with chronic myelogenous leukaemia. *BMJ case reports*. 2016;2016.
33. Otero TM, Barber SR, Yeh DD, Quraishi SA. Necrotizing Soft Tissue Infection or Sweet Syndrome: Surgery Versus No Surgery?: A Case Report. *A & A case reports*. 2017;8(7):182-185.
34. Patel AJK, O'Roin E S. Pyoderma gangrenosum following abdominoplasty - A rare complication. *European Journal of Plastic Surgery*. 2007;29(7):317-319.
35. Preiswerk B, Allemann IB, Maggiorini M, Muller V. From a pimple to a crater. *Lancet (London, England)*. 2011;378(9791):636.
36. Rajapakse Y, Bunker CB, Ghattaura A, et al. Case report: Pyoderma gangrenosum following Deep Inferior Epigastric Perforator (Diep) free flap breast reconstruction. *Journal of Plastic, Reconstructive and Aesthetic Surgery*. 2010;63(4):e395-e396.
37. Reid AB, Stanley P, Grinsell D, Daffy JR. Severe, Steroid-responsive, Myositis Mimicking Necrotizing Fasciitis following Orthopedic Surgery: A Pyoderma Variant with Myonecrosis. *Plastic and reconstructive surgery Global open*. 2014;2(6):e175.
38. Sawatsky A, Virk A. Curious case of the necrotic skin lesion. *Journal of General Internal Medicine*. 2010;25:S506.
39. Schlick K, Regauer S, Beham-Schmid C, et al. Pyoderma gangrenosum heralding acute leukemia for months: Diagnostic hint written on the skin. *Journal of Clinical Oncology*. 2011;29(17):e506-e508.
40. Shen K, Xiang B, Liu T. Sweet syndrome secondary to myelodysplastic syndrome mimicking necrotizing fasciitis. *Annals of hematology*. 2017;96(8):1415-1416.
41. Strau A, Storim J, Germer CT, Dietz UA, Wildenauer R. Pyoderma gangraenosum as rare complication of incisional hernia repair in a patient with Werlhof's disease. *Hernia*. 2011;15(6):709-712.
42. Toh JWT, Whiteley I. Devastating Peristomal Pyoderma Gangrenosum: Challenges in Diagnosis and Management. *Clinical Gastroenterology and Hepatology*. 2017;15(3):A19-A20.
43. Touil LL, Gurusinge DA, Sadri A, El-Gawad A, Fahmy FS. Postsurgical Pyoderma Gangrenosum Versus Necrotizing Fasciitis: Can We Spot the Difference? *Annals of plastic surgery*. 2017;78(5):582-586.
44. Vaysse-Vic M, Mathieu PA, Charissoux A, Charissoux JL, Marcheix PS. Pyoderma gangrenosum or necrotising fasciitis? Diagnostic and therapeutic wanderings. *Orthopaedics & traumatology, surgery & research : OTSR*. 2017;103(4):615-617.
45. Wangia MW, Mitchell CL, Wesson SK, Scott E, Glavin FL. Pyoderma gangrenosum or necrotizing fasciitis? A diagnostic conundrum. Case report and literature review. *Journal of Pediatric Surgery Case Reports*. 2013;1(6):139-142.
46. White LE, Villa MT, Petronic-Rosic V, Jiang J, Medenica MM. Pyoderma gangrenosum related to a new granulocyte colony-stimulating factor. *Skinmed*. 2006;5(2):96-98.
